# Supplementary material for: Optimization of CsPbBr3/PVDF composite for enhanced UV photodetection application
Source: Royal Society of Chemistry journal article supplement (doi:10.1039/d4ra07369j), 2024-01-01
Supplement: d4ra07369j2.pdf [file d4ra07369j2.pdf]

+

## Optimization of CsPbBr<sub>3</sub>/PVDF composite for enhanced UV photodetection application

Amr Elattar<sup>a\*</sup>, Okenwa Okoli<sup>a,b</sup>, Tarik Dickens<sup>a</sup>

<sup>a</sup>. Industrial & Manufacturing Engineering, FAMU-FSU College of Engineering, 2525 Pottsdamer St., Tallahassee, Florida, 32310, USA.

<sup>b</sup>. Herff College of Engineering, University of Memphis, Memphis, TN, 38111, USA.

### Supporting Figures

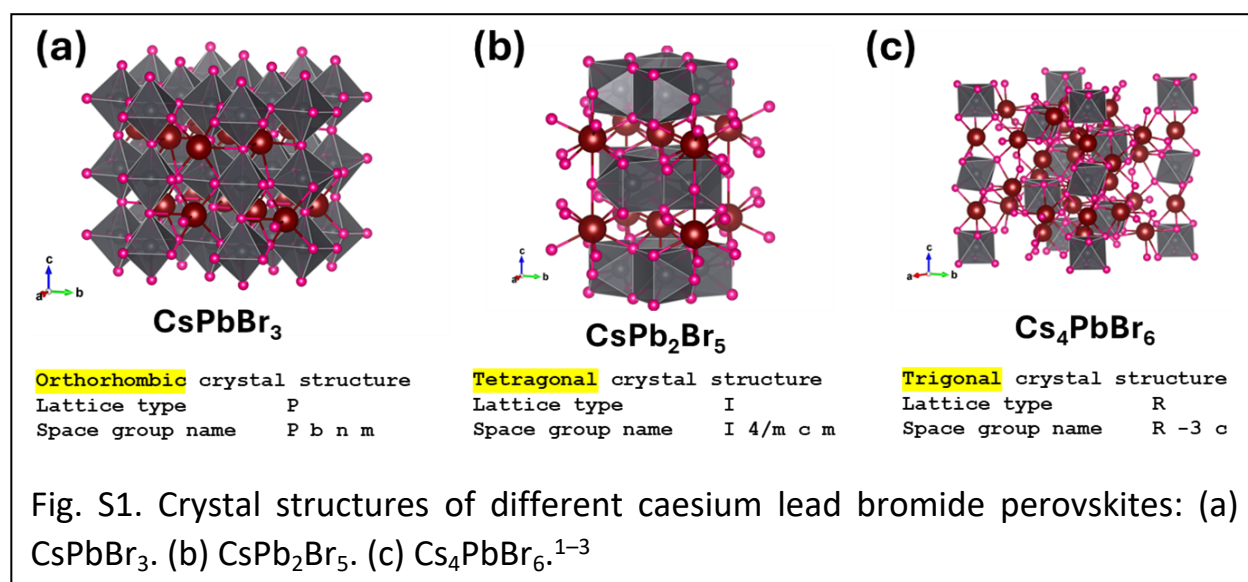

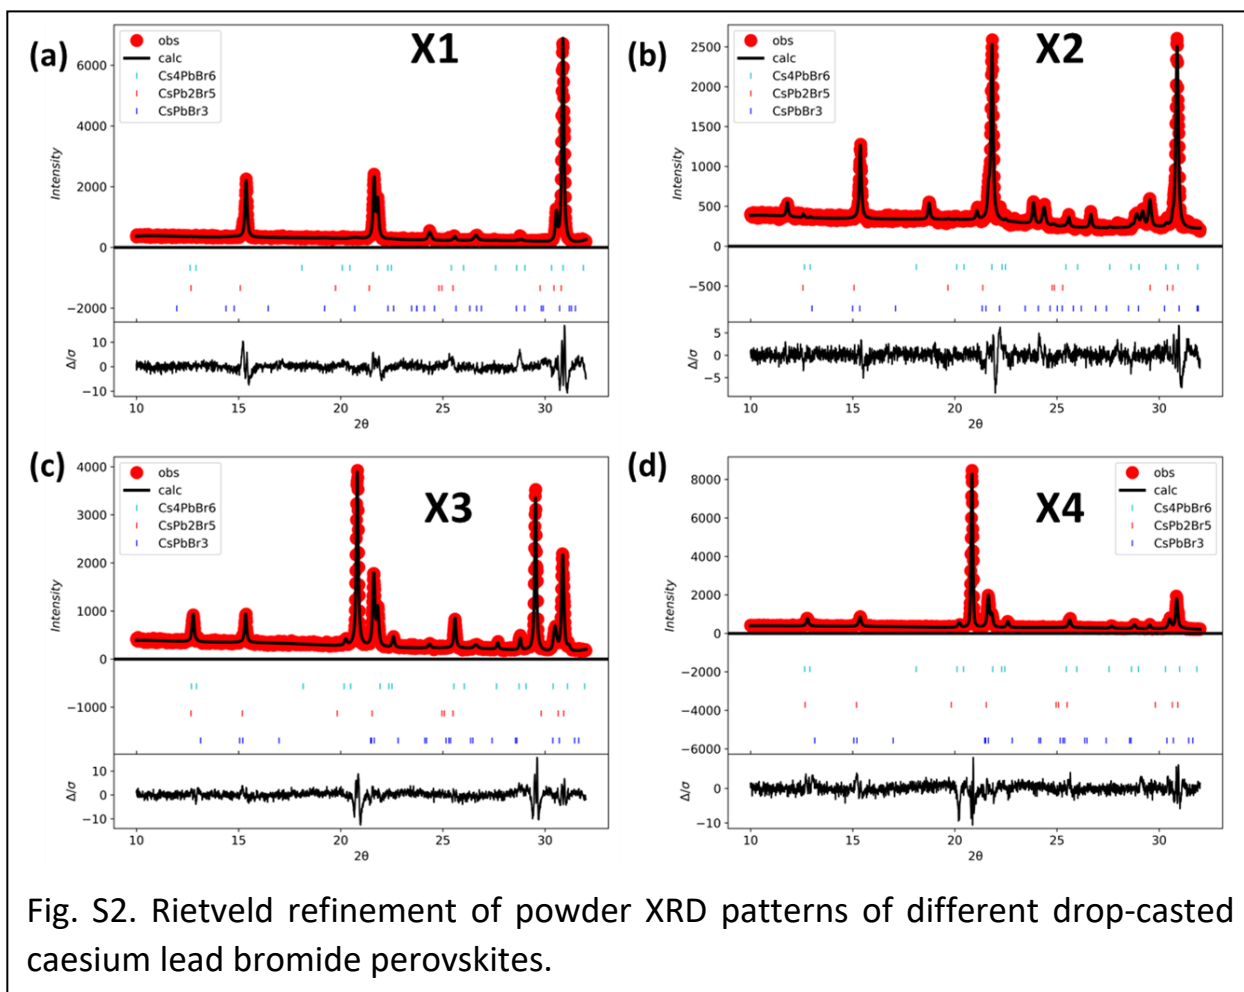

Fig. S2. Rietveld refinement of powder XRD patterns of different drop-casted caesium lead bromide perovskites.

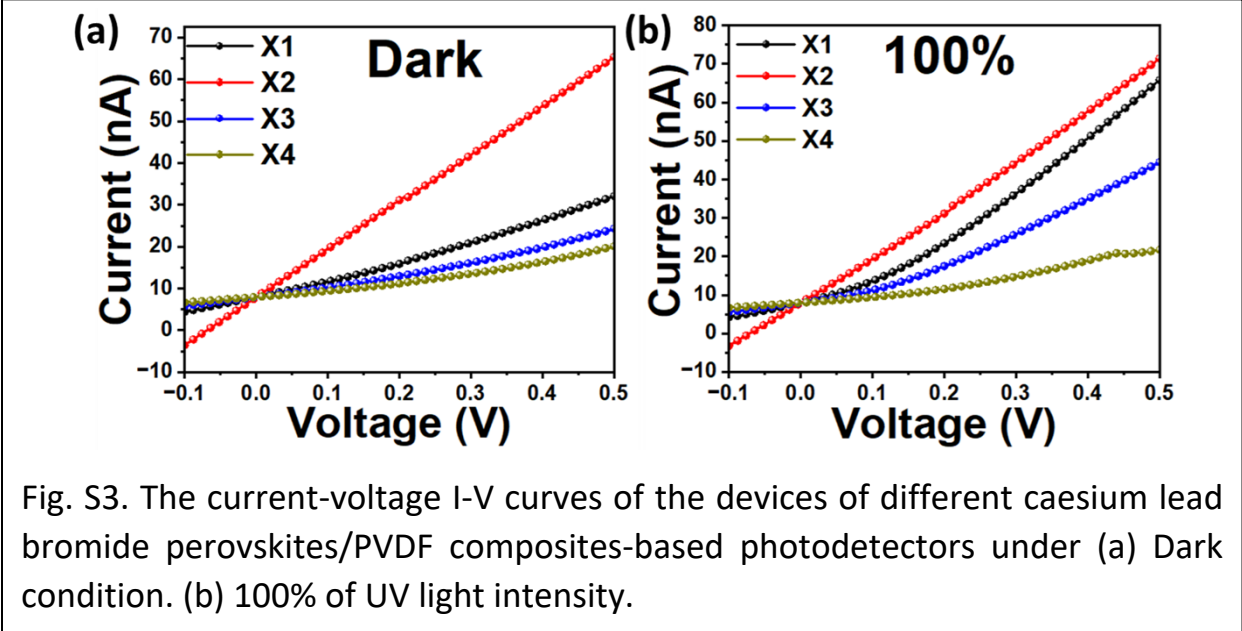

## Supporting Notes

Equations used for calculation of Photodetector parameters are shown through the following equations:

$$R_{\lambda} = \frac{\Delta I}{P_{\lambda} \times A} \quad (1)$$

$$\xi = \frac{I_{Photo} - I_{Dark}}{I_{Dark}} \quad (2)$$

$$IQE (\%) = \frac{h \times c \times R_{\lambda}}{e \times \lambda} \times 100\% \quad (3)$$

$$D^* = \frac{R_{\lambda}}{(2 \times e \times J_{Dark})^{\frac{1}{2}}} \quad (4)$$

Where:

$R_{\lambda}$ : The photoresponsivity of a photodetector which is the photo-current generated through the effective photodetector area per incident light unit power.

$\xi$ : The photosensitivity of a photodetector which is the ratio between the photo-current change under the effect of light illumination and the dark current.

$IQE (\%)$ : The internal quantum efficiency of a photodetector to estimate the efficiency of the carrier transport.

$D^*$ : The detectivity of a photodetector which is related to the photodetector quality.

$I_{Photo}$ : The current under light illumination.

$I_{Dark}$ : The current under no illumination.

$\Delta I$ : The photo-current change under the effect of light illumination.

$P_{\lambda}$ : The incident light intensity (W/cm<sup>2</sup>).

$A$ : The effective area of photodetector (cm<sup>2</sup>).

$h$ : The plank's constant.

$c$ : The light speed.

$e$ : The electron charge.

$\lambda$ : The wavelength of the incident light (nm).

#### References

- 1 M. Rodová, J. Brožek, K. Knížek and K. Nitsch, *J Therm Anal Calorim*, 2003, 71, 667–673.
- 2 V. Drushliak and M. Szafranski, *Inorg Chem*, 2022, 61, 14389–14396.
- 3 M. De Bastiani, I. Dursun, Y. Zhang, B. A. Alshankiti, X.-H. Miao, J. Yin, E. Yengel, E. Alarousu, B. Turedi, J. M. Almutlaq, M. I. Saidaminov, S. Mitra, I. Gereige, A. AlSaggaf, Y. Zhu, Y. Han, I. S. Roqan, J.-L. Bredas, O. F. Mohammed and O. M. Bakr, *Chemistry of Materials*, 2017, 29, 7108–7113.
